# Supplementary material for: The formation of all-cis-(multi)fluorinated piperidines by a dearomatization–hydrogenation process
Source: Springer Nature journal article supplement (doi:10.1038/s41557-018-0197-2), 2019-01-21
Supplement: 41557_2018_197_MOESM87_ESM.mol [file 41557_2018_197_MOESM87_ESM.mol]

nchem.18061279B-comp9.mol
  ChemDraw11211815092D

 14 14  0  0  0  0  0  0  0  0999 V2000
   -1.6030   -0.0270    0.0000 C   0  0  0  0  0  0  0  0  0  0  0  0
   -2.0155   -0.7415    0.0000 C   0  0  0  0  0  0  0  0  0  0  0  0
   -1.2223   -0.5148    0.0000 C   0  0  0  0  0  0  0  0  0  0  0  0
   -0.4242   -0.7415    0.0000 C   0  0  0  0  0  0  0  0  0  0  0  0
   -0.0116   -0.0270    0.0000 N   0  0  0  0  0  0  0  0  0  0  0  0
   -0.8050   -0.2537    0.0000 C   0  0  0  0  0  0  0  0  0  0  0  0
   -1.8057   -1.0982    0.0000 F   0  0  0  0  0  0  0  0  0  0  0  0
    0.8632    0.0646    0.0000 C   0  0  0  0  0  0  0  0  0  0  0  0
    1.3463   -0.6007    0.0000 O   0  0  0  0  0  0  0  0  0  0  0  0
    1.1979    0.8156    0.0000 C   0  0  0  0  0  0  0  0  0  0  0  0
    1.5325    1.5665    0.0000 F   0  0  0  0  0  0  0  0  0  0  0  0
    0.7149    1.4808    0.0000 F   0  0  0  0  0  0  0  0  0  0  0  0
    2.0155    0.9012    0.0000 F   0  0  0  0  0  0  0  0  0  0  0  0
   -0.4242   -1.5665    0.0000 C   0  0  0  0  0  0  0  0  0  0  0  0
 10 11  1  0      
 10 12  1  0      
 10 13  1  0      
  8 10  1  0      
  8  9  2  0      
  5  8  1  0      
  4 14  1  0      
  1  2  1  0      
  2  3  1  0      
  3  4  1  0      
  4  5  1  0      
  5  6  1  0      
  6  1  1  0      
  3  7  1  0      
M  STY  1   1 SUP
M  SLB  1   1   1
M  SAL   1  6   8   9  10  11  12  13
M  SBL   1  1   6
M  SMT   1 TFA
M  SBV   1   6   -0.8749   -0.0917
M  STY  1   2 SUP
M  SLB  1   2   2
M  SAL   2  1  14
M  SBL   2  1   7
M  SMT   2 Me
M  SBV   2   7    0.0000    0.8250
M  END
