# Supplementary material for: The formation of all-cis-(multi)fluorinated piperidines by a dearomatization–hydrogenation process
Source: Springer Nature journal article supplement (doi:10.1038/s41557-018-0197-2), 2019-01-21
Supplement: 41557_2018_197_MOESM473_ESM.mol [file 41557_2018_197_MOESM473_ESM.mol]

nchem.18061279B-compRh2.mol
  ChemDraw11211814452D

 34 34  0  0  0  0  0  0  0  0999 V2000
    0.5269    1.9399    0.0000 C   0  0  0  0  0  0  0  0  0  0  0  0
   -0.2981    1.9399    0.0000 C   0  0  0  0  0  0  0  0  0  0  0  0
   -0.5531    1.1552    0.0000 N   0  0  0  0  0  0  0  0  0  0  0  0
    0.1144    0.6703    0.0000 C   0  0  0  0  0  0  0  0  0  0  0  0
    0.7819    1.1552    0.0000 C   0  0  0  0  0  0  0  0  0  0  0  0
   -0.7830    2.6074    0.0000 C   0  0  0  0  0  0  0  0  0  0  0  0
    0.0764    2.6750    0.0000 C   0  0  0  0  0  0  0  0  0  0  0  0
    1.3653    0.5718    0.0000 C   0  0  0  0  0  0  0  0  0  0  0  0
    2.0821    0.9804    0.0000 C   0  0  0  0  0  0  0  0  0  0  0  0
    2.9071    0.9804    0.0000 C   0  0  0  0  0  0  0  0  0  0  0  0
    2.3236    1.5638    0.0000 C   0  0  0  0  0  0  0  0  0  0  0  0
    1.6068    1.1552    0.0000 C   0  0  0  0  0  0  0  0  0  0  0  0
   -1.3378    0.9003    0.0000 C   0  0  0  0  0  0  0  0  0  0  0  0
   -1.9509    1.4523    0.0000 C   0  0  0  0  0  0  0  0  0  0  0  0
   -2.7355    1.1974    0.0000 C   0  0  0  0  0  0  0  0  0  0  0  0
   -2.9071    0.3904    0.0000 C   0  0  0  0  0  0  0  0  0  0  0  0
   -2.2940   -0.1616    0.0000 C   0  0  0  0  0  0  0  0  0  0  0  0
   -1.5094    0.0933    0.0000 C   0  0  0  0  0  0  0  0  0  0  0  0
   -1.7794    2.2593    0.0000 C   0  0  0  0  0  0  0  0  0  0  0  0
   -0.8963   -0.4587    0.0000 C   0  0  0  0  0  0  0  0  0  0  0  0
   -1.0678   -1.2657    0.0000 C   0  0  0  0  0  0  0  0  0  0  0  0
   -0.1116   -0.2038    0.0000 C   0  0  0  0  0  0  0  0  0  0  0  0
   -2.3925    2.8113    0.0000 C   0  0  0  0  0  0  0  0  0  0  0  0
   -0.9650    2.3687    0.0000 C   0  0  0  0  0  0  0  0  0  0  0  0
   -0.5592   -1.2374    0.0000 C   0  0  0  0  0  0  0  0  0  0  0  0
   -1.1363   -1.6431    0.0000 C   0  0  0  0  0  0  0  0  0  0  0  0
   -0.0617   -2.8113    0.0000 C   0  0  0  0  0  0  0  0  0  0  0  0
    0.3848   -2.3077    0.0000 C   0  0  0  0  0  0  0  0  0  0  0  0
   -0.2192   -2.2425    0.0000 C   0  0  0  0  0  0  0  0  0  0  0  0
   -0.6412   -2.6890    0.0000 C   0  0  0  0  0  0  0  0  0  0  0  0
   -1.0873   -2.3858    0.0000 C   0  0  0  0  0  0  0  0  0  0  0  0
   -0.5184   -2.0535    0.0000 C   0  0  0  0  0  0  0  0  0  0  0  0
    0.2376   -1.1632    0.0000 Rh  0  3  0  0  0  0  0  0  0  0  0  0
    1.5578   -1.1632    0.0000 Cl  0  5  0  0  0  0  0  0  0  0  0  0
  1  2  1  0      
  2  3  1  0      
  3  4  1  0      
  4  5  1  0      
  5  1  1  0      
  2  6  1  0      
  2  7  1  0      
  5  8  1  0      
  8  9  1  0      
  9 10  1  0      
 10 11  1  0      
 11 12  1  0      
 12  5  1  0      
  3 13  1  0      
 13 14  2  0      
 14 15  1  0      
 15 16  2  0      
 16 17  1  0      
 17 18  2  0      
 18 13  1  0      
 14 19  1  0      
 18 20  1  0      
 20 21  1  0      
 20 22  1  0      
 19 23  1  0      
 19 24  1  0      
 25 26  2  0      
 27 28  2  0      
 28 29  1  0      
 27 30  1  0      
 26 31  1  0      
 25 32  1  0      
 31 30  1  0      
 32 29  1  0      
M  RAD  1   4   1
M  CHG  2  33   1  34  -1
M  END
